# Supplementary material
Source: PubMed Central journal article supplement (PMC5819878)
Supplement: NIHMS940868-supplement-supplement_1.pdf [file NIHMS940868-supplement-supplement_1.pdf]

Supplemental Table I. Primer and probe sequences for *BCL2/IGH*-PCR of alternative *BCL2* breakpoints

|              |         |                       |
|--------------|---------|-----------------------|
| Test tube 1  |         |                       |
|              | MBR 1   | CTCTGTGGCATTATTGCATTA |
|              | MBR 2   | CCTAAGAAAAACCTGGATGTC |
| Test tube 2  |         |                       |
|              | MCR 1   | CAAGCGCCCAATAAATAGCAG |
|              | MCR 2   | GGAGTGGAAAGGAAGGACAAT |
|              | MCR 3   | AAATCCAAAATCAAATATGTG |
| Test tube 3  |         |                       |
|              | 3'MBR 1 | AGCACCTGCTGGATACAACAC |
|              | 3'MBR 2 | TGACAGAGCAAAACATGAACA |
|              | 3'MBR 3 | TGTAATGACTGGGGAGCAAAT |
|              | 3'MBR 4 | CTGGTTGGCGTGGTTTAGAGA |
|              | 5'MCR   | CTGAAAGAAACGAAAGCAACA |
|              | ICR     | AGTGAGAGTGCAGAATCTGAC |
| JH primers   |         |                       |
|              | JH 1    | AGCACCTGTCCCAAGTCTGA  |
|              | JH 2    | GTGCCTGGACAGAGAAGACTG |
|              | JH 3    | AGAGAAAGGAGGCAGAAGGAA |
|              | JH 4    | AAGCAGGAGAGAGGTTGTGAG |
|              | JH 5    | AAAATGCCTCCAAGACTCTGA |
|              | JH 6    | GAAAACAAAGGCCCTAGAGTG |
| JH MGB probe |         | CTGAGGAGACGGTGACC     |

Supplemental Methods: The PCR for alternative *BCL2/IGH* breakpoints was done as a multiplex PCR. *BCL2* primers (test tubes 1, 2 and 3) were combined with all six *JH* primers and the *JH* MGB probe. Cycling conditions and reagents were identical to the MBR-PCR. For PCR-positive tumor samples, the respective *BCL2* and *IGH* primers were identified and used for analysis of corresponding blood samples.

Supplemental Table II. *BCL2*-MBR translocation sequences from blood of control patients who did not develop follicular lymphoma (FL)

| <u>Case no.</u> | <u>Translocation frequency per 100,000 cells</u> | <i>BCL2</i> -<br>MBR<br>break-<br>point* | <u>Nontemplated N nucleotides</u>   | <u>N length (bp)</u> | <i>JH</i><br><u>gene</u> | <i>IGH</i><br>break-<br>point† | <u>PCR fragment length (bp)</u> |
|-----------------|--------------------------------------------------|------------------------------------------|-------------------------------------|----------------------|--------------------------|--------------------------------|---------------------------------|
| Control 1       | 1.6                                              | 3053                                     | CCGCTGAACCCA                        | 12                   | 6                        | 2948                           | 153                             |
| Control 2       | 0.1                                              | 3056                                     | TTCTGACGGACTCCAAGACTGGAATTGATCATTAT | 35                   | 6                        | 2959                           | 166                             |
| Control 3‡      | 0.4                                              | 3056                                     | TGGGGACTAC                          | 10                   | 6                        | 2967                           | 134                             |
| Control 4§      | 0.7                                              | 3056                                     | TTGCGAGCAGGGTGAT                    | 16                   | 6                        | 2968                           | 139                             |
| Control 5       | 0.4                                              | 3109                                     | GGGA                                | 4                    | 6                        | 2959                           | 188                             |
| Control 6       | 0.1                                              | 3112                                     | GGGGGCCGGTCATTGGGGTTCGG             | 23                   | 6                        | 2949                           | 219                             |
| Control 4§      | 0.7                                              | 3114                                     | ATTCGTTCACCCACGGACTTGACCT           | 26                   | 6                        | 2968                           | 209                             |
| Control 7       | 0.1                                              | 3146                                     | CCGTCCGGGATGGAGCA                   | 17                   | 6                        | 2953                           | 246                             |
| Control 8       | 0.4                                              | 3154                                     | GCAAGTAAAAGCTTAGAGAT                | 20                   | 5                        | 2368                           | 239                             |
| Control 9       | 0.2                                              | 3162                                     | TCCTCGGACCG                         | 11                   | 3                        | 1537                           | 247                             |

\* *BCL2* sequence based on GenBank accession number M14745.

† *IGH* sequence based on GenBank accession number J00256.

‡ Sequence identical to Case no. MBR1 blood DNA amplified in an adjacent well.

§ Two different sequences isolated from the same patient.
